# Supplementary material
Source: publisher figshare collection journal article supplement (https://frontiersin.figshare.com/ndownloader/files/15014936)
Supplement: Supplementary file [file 15014936]

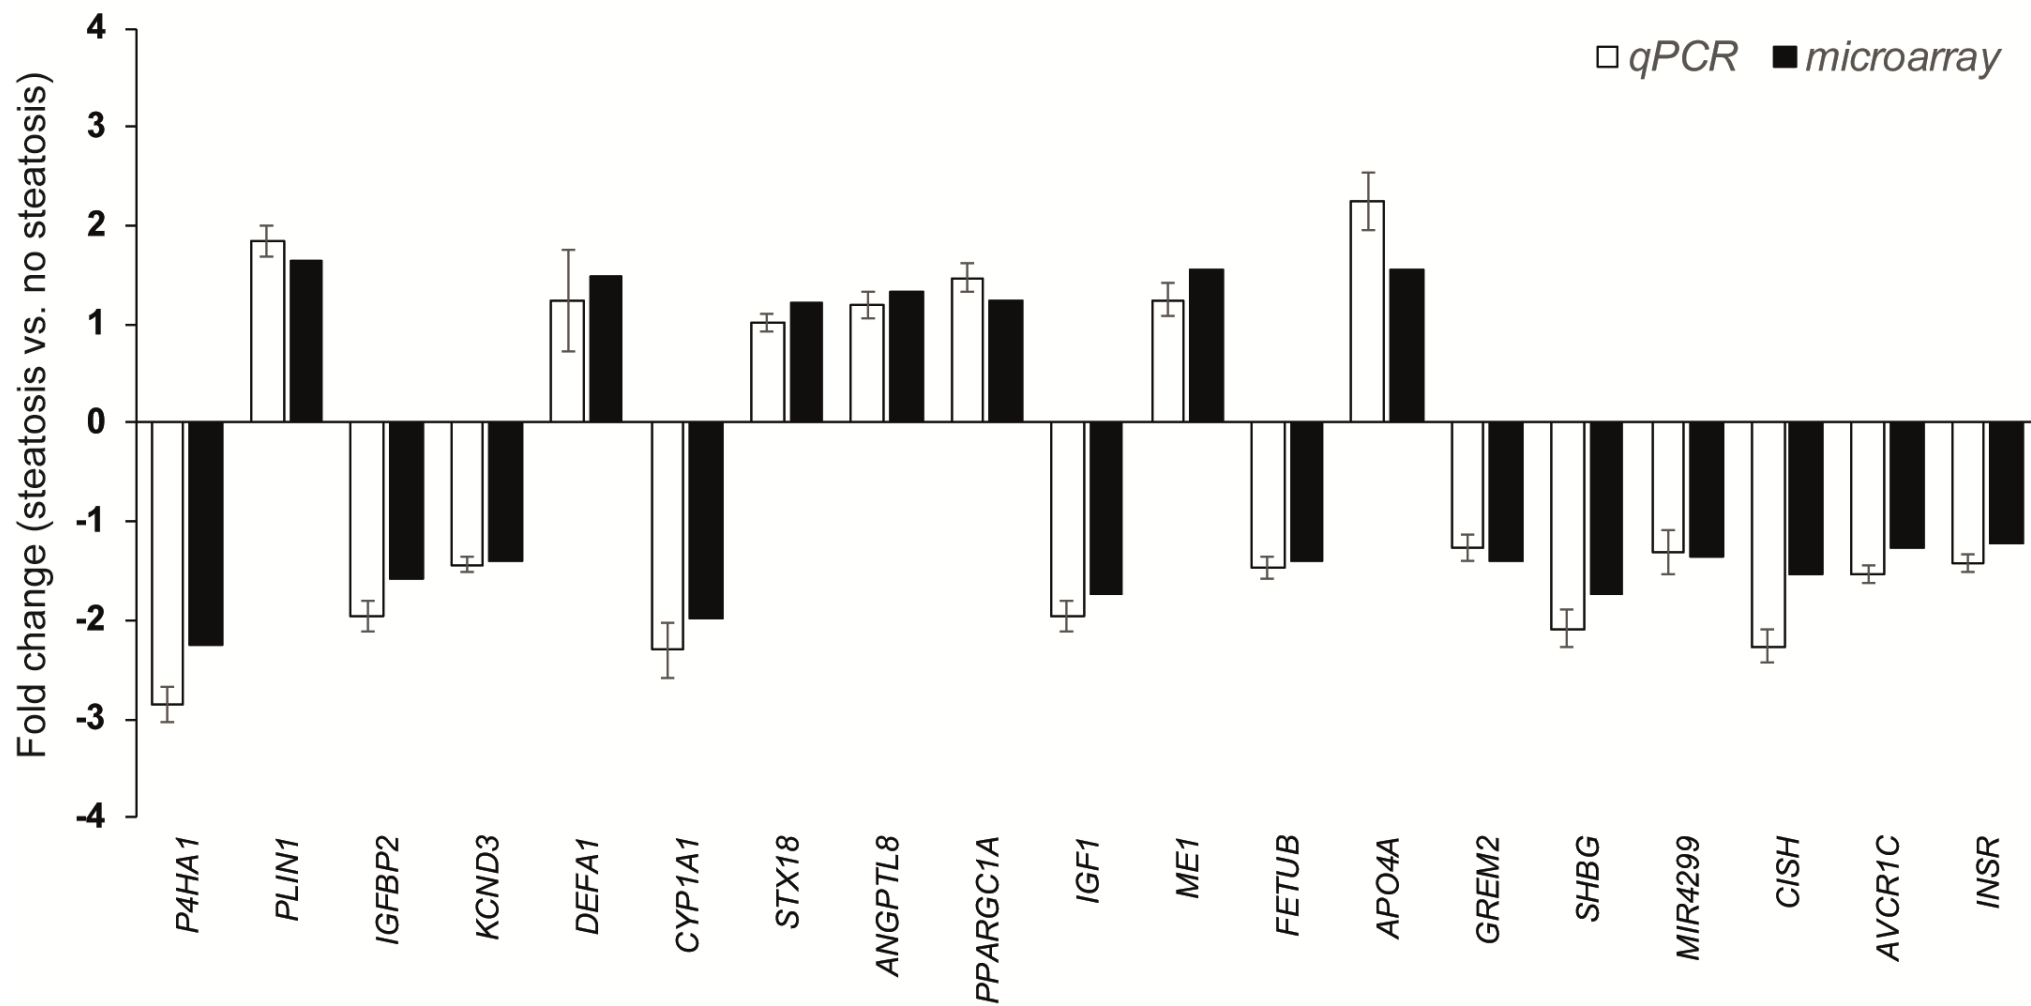

**Supplementary Figure S1:** Validation of transcriptomic results by qPCR. Fold changes are indicated for comparison of expression between steatotic vs. non-steatotic liver graft samples (qPCR: white bars; microarray: black bars). The microarray fold-change values are shown based on Partek Genomics Suite analysis (see Methods), the qPCR results are expressed as the mean fold-change + standard error of mean for each transcript. The gene symbols are used in accordance with the names approved by the HUGO Gene Nomenclature Committee.
